# Supplementary material for: QTL-mapping in the obese Berlin Fat Mouse identifies additional candidate genes for obesity and fatty liver disease
Source: Research Square preprint supplement (doi:10.21203/rs.3.rs-1339100/v1), 2022-03-11
Supplement: Supplementary file 1 [file 0dbc84d182d7136a83b0ba31.xlsx]

## Sheet: Tabelle1
Table 3
Phenotype	Age [weeks]	N	QTL region				LOD(BH)	% AIL Var	Mean BFMI/BFMI	Mean B6/BFMI	Mean B6/B6
			Chr	Start [bp]	Top [bp]	Stop [bp]
Body weight [g]	9	123	3	34066622	35986311	40043158	7.45	8.1	34.21	29.08	28.02
	10	123	3	34066622	35986311	40043158	5.69	9.5	36.27	29.98	29.33
	11	123	3	34066622	38187507	40043158	7.24	9.6	38.04	30.75	29.85
	12	123	3	34066622	35986311	40043158	5.92	9.2	39.54	31.68	30.51
	13	123	3	34066622	35986311	40043158	7.08	11.2	40.93	32.57	31.86
	14	123	3	34066622	35986311	40043158	8.89	13	42.46	33.4	32.37
	15	123	3	34066622	38187507	40043158	7.22	10.4	42.93	33.86	33.2
	16	123	3	34066622	35986311	40043158	7.74	12.7	44.34	34.57	33.53
	16	123	6	0	13919413	17553096	5.41	8	43.33	45.14	41.47
	17	123	3	34066622	38187507	40043158	4.97	8.6	44.98	36.07	35.15
	18	123	3	34066622	38187507	40043158	5.24	9.1	45.6	36.21	35.81
	19	123	3	34066622	35986311	40043158	5.63	9.1	45.05	36.13	34.78
	20	123	3	34066622	35986311	40043158	5.07	9.8	46.06	37.54	35.91
ScAT weight [g]	20	121	3	34066622	38187507	40043158	5.8	9.1	0.95	0.52	0.48
BMI [kg/m2]	20	122	3	34066622	38187507	40043158	4.94	10.4	4.2	3.76	3.67
Liver weight [g]	20	123	1	157132066	158663689	168495457	4.96	5.6	1.81	1.55	-
