# Supplementary material for: QTL-mapping in the obese Berlin Fat Mouse identifies additional candidate genes for obesity and fatty liver disease
Source: Research Square preprint supplement (doi:10.21203/rs.3.rs-1339100/v1), 2022-03-11
Supplement: Supplementary file 2 [file 39b00e716b44a675eb4600d1.xlsx]

## Sheet: Tabelle1
Table 2
	Covariates
	Sex	Subfamily	Litter size
Body weight	1e-05	0.00097	0.17152
(20 weeks)
GTT AUC	2.01e-06	0.01	0.05274
ITT AUC	0.00025	0.00022	0.12422
GonAT weight	0.00087	0.00029	0.01736
ScAT weight	0.55182	3.35e-06	0.11907
Liver weight	1.07e-09	0.00077	0.19891
Liver TG	0.28798	0.51456	0.48629
Plasma cholesterol	0.0051	0.01481	0.59906
Plasma FFA	0.00543	0.20579	0.50047
Plasma TG	3.24e-10	0.11351	0.98701
Plasma insulin	0.52115	0.00252	0.54256
Body length	0.00012	0.10646	0.08461
BMI	6e-05	0.00062	0.23395
SMuscle fat %	0.03634	3e-05	0.03419
