# Supplementary material for: QTL-mapping in the obese Berlin Fat Mouse identifies additional candidate genes for obesity and fatty liver disease
Source: Research Square preprint supplement (doi:10.21203/rs.3.rs-1339100/v1), 2022-03-11
Supplement: Supplementary file 6 [file f4390d54b1de919fccdd3d83.xlsx]

## Sheet: Tabelle1
Table 4
Gene score	Phenotype	Chr	Positional candidate gene	Type of mutation	P-value	FC liver
					liver	(S1/B6N)
12	Liver weight	1	Astn1	Deleterious domain missense, CTCF binds, UTRs, enhancer and promoter variant	0.66493	-0.03
10		1	Sec16b	Deleterious missense, CTCF binds, UTRs, enhancer and promoter variant	0.54953	-0.01
13	Body weight,	3	Frem2	Deleterious domain missense, CTCF binds, UTRs, enhancer and promoter variant	0.02092	0.12
12	scAT weight,	3	Bbs7	Tolerated domain missense, CTCF binds, UTRs, enhancer and promoter variant	0.01346	-0.14
12	BMI	3	Noct	Tolerated domain missense, CTCF binds, UTRs, and promoter variant	0.00876	-0.17
10	Body weight	6	Met	Tolerated domain missense, CTCF binds, UTRs, and enhancer variant	8.2e-06	-0.1
9		6	Ica1	CTCF binds, UTRs, enhancer and promoter variant	0.002	-0.15
16	Liver TG	8	Fto	Tolerated domain missense, stop gained, CTCF binds, UTRs, enhancer and promoter variant	0.01092	-0.09
13		8	Lpcat2	Deleterious domain missense, CTCF binds, UTRs, enhancer and promoter variant	0.22981	-0.05
