# Supplementary material for: QTL-mapping in the obese Berlin Fat Mouse identifies additional candidate genes for obesity and fatty liver disease
Source: Research Square preprint supplement (doi:10.21203/rs.3.rs-1339100/v1), 2022-03-11
Supplement: Supplementary file 7 [file 75bd5cd97caceb4b66f8f117.xlsx]

## Sheet: Tabelle1
Table S1. Mean and standard deviation of traits collected in the AIL population.
	Mean (SD) AIL
Body weight [g]	21.9 ± 7.27
GonAT weight [g]	1.53 ± 1.0
ScAT weight [g]	0.65 ± 0.32
Liver weight [g]	1.92 ± 0.55
GTT AUC	21,002 ± 12,415
ITT AUC	7,308 ± 3,195
Liver triglycerides µg TG / µg protein	112 ± 68
Plasma triglycerides µg TG / µg protein	896 ± 506
Plasma cholesterol mg/dl	44 ± 9
Plasma FFA mmol/l	0.23 ± 0.06
Plasma insulin ng/mL	7 ± 13
Skeletal muscle fat %	19 ± 5
Abbreviations: GonAT, gonadal adipose tissue; ScAT, subcutaneous adipose tissue; TG, triglycerides; ITT, insulin tolerance test; GTT, glucose tolerance test; AUC, area under the curve; FFA, free fatty acids.
