# Supplementary material for: QTL-mapping in the obese Berlin Fat Mouse identifies additional candidate genes for obesity and fatty liver disease
Source: Research Square preprint supplement (doi:10.21203/rs.3.rs-1339100/v1), 2022-03-11
Supplement: Supplementary file 8 [file c5fbaca647c10596b5c679c7.xlsx]

## Sheet: Tabelle1
Table 1
	Liver	GonAT	ScAT	Liver	GTT	ITT	Plasma	Plasma	Plasma	Plasma	BMI	Body	SMuscle
	weight	weight	weight	TG/Proteins	AUC	AUC	TG	FFA	cholesterol	insulin		length	fat %
Body weight	0.74	0.64	0.81	0.34	0.78	0.84	0.34	0.08	0.66	0.42	0.98	0.63	0.63
(20 weeks)
Liver weight		0.21	0.43	0.15	0.61	0.66	0.56	0.16	0.55	0.2	0.68	0.62	0.33
GonAT weight			0.77	0.32	0.49	0.52	-0.07	0.09	0.36	0.35	0.66	0.23	0.74
ScAT weight				0.44	0.62	0.7	0.12	0.02	0.51	0.48	0.81	0.4	0.81
Liver TG/Proteins					0.25	0.33	-0.29	-0.03	0.26	0.27	0.35	0.08	0.45
GTT AUC						0.74	0.39	0.02	0.49	0.39	0.79	0.37	0.56
ITT AUC							0.33	0.03	0.62	0.39	0.84	0.44	0.59
Plasma TG								0.28	0.34	0.25	0.3	0.38	0.05
Plasma FFA									0.25	0.01	0.03	0.14	-0.01
Plasma cholesterol										0.22	0.65	0.45	0.39
Plasma insulin											0.43	0.13	0.48
BMI												0.48	0.65
Body length													0.22
